1 **Colistin resistance prevalence in *Escherichia coli* from domestic**  
2 **animals in intensive breeding farms of Jiangsu Province, China**

3  
4 **A brief title:** *mcr* genes in pigs, chicken and cattle

5  
6 **X. Zhang<sup>1,2\*</sup>, B. Zhang<sup>1,2</sup>, Z. Yu<sup>1,2</sup>, Y. Guo<sup>1,2</sup>, J. Wang<sup>1,2</sup>, P. Zhao<sup>3</sup>, J. Liu<sup>3</sup>, K. He<sup>1,2\*</sup>**

7  
8 <sup>1</sup>Institute of Veterinary Medicine, Jiangsu Academy of Agricultural Sciences; Key Laboratory of  
9 Engineering Research of Veterinary Bio-products of Agricultural Ministry; Jiangsu Key  
10 Laboratory for Food Quality and Safety-State Key Laboratory Cultivation Base of Ministry of  
11 Science and Technology, Nanjing, China.

12 <sup>2</sup>Jiangsu Co-innovation Center for Prevention and Control of Important Animal Infectious  
13 Diseases and Zoonoses, Yangzhou, China.

14 <sup>3</sup>College of Veterinary Medicine, Henan University of Animal Husbandry and Economy,  
15 Zhengzhou, China.

16  
17

18 **Abstract**

19 The global dissemination of colistin resistance has received a great deal of attention. Recently,  
20 the plasmid-mediated colistin resistance encoded by *mcr-1* and *mcr-2* genes in *Escherichia*  
21 *coli* (*E.coli*) strains from animals, food, and patients in China have been reported continuously.  
22 To make clear the colistin resistance and *mcr* gene spread in domestic animals in Jiangsu  
23 Province, we collected faecal swabs from pigs, chicken and cattle at different age distributed  
24 in intensive feeding farms. The selected chromogenic agar and *mcr*-PCR were used to screen  
25 the colistin resistance and *mcr* gene carriage. Colistin resistant *E.coli* colonies were identified  
26 from 54.25 % (440/811) pig faecal swabs, from 35.96 % (443/1232) chicken faecal swabs,  
27 and 26.92 % (42/156) from cattle faecal swabs. Of all the colistin resistant *E.coli* colonies, the  
28 positive amplifications of *mcr-1* were significantly higher than *mcr-2*. The *mcr-1* prevalence

29 was 68.86 % (303/440) in pigs, 87.58 % (388/443) in chicken, and 71.43 % (30/42),  
30 compared with 46.82 % (206/440) in pigs, 14.90 % (66/443) in chicken, and 19.05 % (8/42)  
31 in cattle of prevalence of *mcr-2*. Co-occurrence of *mcr-1* and *mcr-2* was identified in 20 %  
32 (88/440) in pigs, 7.22 % (32/443) in chickens, and in 9.52 % (4/42) cattle. These data indicate  
33 that *mcr* was the most important colistin resistance mechanism. Interventions and alternative  
34 options are necessary to minimise further dissemination of *mcr* between food-producing  
35 animals and human.

## 36 **IMPORTANCE**

37 Colistin is recognized one of the last defence lines for the treatment of highly resistant  
38 bacteria, but the emergence of resistance that conferred by a transferable plasmid-mediated  
39 *mcr* genes to this vital antibiotic is extremely disturbing. Here, we used *E. coli* as an index to  
40 monitor drug resistance in domestic animals (pigs, chicken and cattle). It was found that the  
41 colistin resistance widely occurred at all ages of domestic animals and the *mcr*-dependent  
42 mechanism dominated in *E.coli*. We also found that the elder and adult animals were a  
43 reservoir of resistant strains, suggesting a potential food safety issue and greater public health  
44 problems.

45 **KEY WORDS** Colistin; *mcr* gene; bacteria; intensive breeding farms; China

46

## 47 **1 INTRODUCTION**

48 Colistin is recognized one of the last defence lines for the treatment of highly resistant  
49 bacteria, but the emergence of resistance that conferred by a transferable plasmid-mediated  
50 *mcr-1* gene to this vital antibiotic is extremely disturbing. Actually, the mechanism of colistin  
51 resistance can be generally classified as *mcr*-independent or *mcr*-dependent. In a Morbidity  
52 and Mortality Weekly Report (MMWR) in September 2016, Vasquez and colleagues isolated  
53 a shiga-toxin-producing *Escherichia coli* (STEC) O157 with the *mcr-1* gene in the whole  
54 genome sequence from stool [1]. In November 2016 in *the Lancet Infectious Diseases*, Liu et  
55 al. reported finding a transferable plasmid-mediated *mcr-1* gene in *E. coli* isolates from

56 animal food in China [2]. Compared with *Klebsiella pneumoniae* and *Pseudomonas*  
57 *aeruginosa*, in *E. coli* rare colistin resistance was mediated by chromosomal mutations and  
58 possibly imposed a fitness cost to the organism [3], which suggested that *mcr*-dependent  
59 colistin resistance perhaps was the major mechanism in *E.coli*, and would promote colistin  
60 resistance transmission among bacteria by plasmid transfer and chromosomal recombination.  
61 In China, [4]since the early 1980s colistin has been used in animals as a therapeutic drug and  
62 feed additive, which emphasizes that the use of colistin in animal feed has probably  
63 accelerated the dissemination of *mcr* gene in animals and subsequently humans.

## 64 **2 MATERIALS AND METHODS**

### 65 **2.1 Sample collection**

66 From March 2015 to December 2016, a surveillance of colistin resistant *E.coli* was conducted  
67 in Jiangsu Province, China. A total of 2199 faecal swab samples (**Table 1**) were collected  
68 from pigs, chicken and cattle. 811 faecal swab samples were collected from suckling piglets,  
69 weaned piglets, fattening pigs, and sows. 1232 faecal swab samples were collected from  
70 chicks, egg-laying growers and laying hens. 156 faecal samples were collected from calves,  
71 growing cows and milking cows.

### 72 **2.2 Colistin resistance screening**

73 *E. coli* has been identified as an index for monitoring drug resistance [5-6]. Here, we used  
74 *E.coli* selected chromogenic agar with 10 µg/mL of colistin sulphate [1] to test drug  
75 resistance to *E.coli* in domestic animal faeces. Each swab was dipped in 2 mL PBS for two  
76 hours at 4°C, and then homogenised by vortex. The homogenates were centrifuged at 500 rpm  
77 for 15 minutes. After the aspirated supernatants were centrifuged at 12,000 rpm for 5 min, the  
78 pellets were suspended with 1 mL PBS. Tenfold dilution series of 100 µL of the suspended  
79 pellets were plated onto *E.coli* selected chromogenic agar (HopeBio Biotech Corp., China)  
80 containing colistin sulphate. After overnight incubation at 37°C, the blue-green ones were  
81 counted as *E.coli* colonies (HopeBio Biotech Corp., China). If necessary, the faecal swabs  
82 were dropped into Tryptic Soy Broth (TSB) with antibiotics for enrichment and then bacterial

83 culture was plated onto *E.coli* selected chromogenic agar (HopeBio Biotech Corp., China).

### 84 **2.3 *mcr-1* and *mcr-2* screening**

85 All blue-green colonies were picked into Luria-Bertani (LB) broth for 6 h enrichment, and  
86 bacterial culture were prepared DNA template by conventional boiling method. For the *E.coli*  
87 colonies identified, PCR was used to verify them by primer pairs of P1-F and P1-R [7] from  
88 the 16sRNA gene. For *mcr-1* gene and *mcr-2* screening, two primers pairs of P2-F/R [1] and  
89 P3-F/R [8] were used to amplify them. All the positive amplifications were sequenced by  
90 Genscript Corporation (Nanjing, China). Primers used in this study were listed in **Table 2**.

## 91 **3. RESULT**

### 92 **3.1 Plate screening for colistin-resistant *E.coli* colonies**

93 All blue-green colonies from *E.coli* selected chromogenic agar were recognized *E.coli*  
94 colonies after double identification using primer pairs of 16sRNA. In pigs, colistin resistant  
95 colonies were identified from 19.10 % (38/199) of sucking piglet, 40.76 % (86/211) of  
96 weaned piglet, 73.64 % (162/220) of fattening pig, and 85.08 % (154/181) of sow. In chicken,  
97 colistin resistant colonies were identified from 20 % (80/400) of chick, 37.44 % (152/406) of  
98 egg-laying grower, and 49.53 % (211/426) of laying hen. In cattle, colistin resistant colonies  
99 were identified from 14 % (7/50) of calve, 31.37 % (16/51) of growing cow, and 34.55%  
100 (19/55) of milking cow. Data on prevalence of colistin resistance in swab samples from all  
101 ages of domestic animals are presented in **Fig 1**.

### 102 **3.2 Prevalence of *mcr-1***

103 The *mcr-1* was identified in colistin-resistant *E.coli* colonies from all ages of pigs, chickens,  
104 and cattle. The *mcr-1* prevalence was 68.86 % (303/440) in pigs, 87.58 % (388/443) in  
105 chicken, and 71.43 % (30/42) in cattle (**Fig. 1**). For pigs, the specific *mcr-1* PCR identified  
106 the gene in 60.53 % (23/38) of suckling piglets, 60.47 % (52/86) of weaned piglets, 68.52 %  
107 (111/162) of fattening pigs, and 75.97 % (117/154) of sows. For chickens, the specific *mcr-1*  
108 PCR identified the gene in 83.75 % (67/80) of chicks, 88.16 % (134/152) of egg-laying  
109 growers, and 88.63 % (187/211) of laying hens. For cattle, the specific *mcr-1* PCR identified  
110 the gene in 57.14 % (4/7) of calves, 75.00 % (12/16) of growing cows, and 73.68 % (14/19)

111 of milking cows.

### 112 **3.2 Prevalence of *mcr-2***

113 The *mcr-2* was identified in colistin-resistant *E.coli* colonies from all ages of pigs, chickens,  
114 and cattle. The *mcr-2* prevalence was 46.82 % (206/440) in pigs, 14.90 % (66/443) in chicken,  
115 and 19.05 % (8/42) in cattle (**Fig. 1**). For pigs, the specific *mcr-2* gene was amplified from  
116 36.84 % (14/38) of suckling piglets, 39.53 % (34/86) of weaned piglets, 49.38 % (80/162) of  
117 fattening pigs, and 50.65 % (78/154) of sows. For chickens, the specific *mcr-2* gene was  
118 amplified from 10 % (8/80) of chicks, 12.50 % (19/152) of egg-laying growers, and 18.48 %  
119 (39/211) of laying hens. For cattle, the specific *mcr-2* gene was amplified from 28.57 % (2/7)  
120 of calves, 12.50 % (2/16) of growing cows, and 21.05 % (4/19) of milking cows.

### 121 **3.3 Co-occurrence of *mcr-1* and *mcr-2***

122 Both *mcr-1* and *mcr-2* positive amplifications were 20 % (88/440) in pigs, 7.22 % (32/443) in  
123 chickens, and 9.52 % (4/42) in cattle (**Table 1**). Dual positivity was identified in 7.89 % (3/38)  
124 of suckling piglets, 9.30 % (8/86) of weaned piglets, 20.37 % (33/162) of fattening pigs,  
125 28.57 % (44/154) of sows, 5.00 % (4/80) of chicks, 4.61% (7/152) of egg-laying growers,  
126 9.95 % (21/211) of laying hens, 6.25 % (1/16) of growing cows, and 15.79 % (3/19) of  
127 milking cows, but not in calves.

## 128 **4. DISCUSSION**

129 In the 1960s colistin was introduced into in food animal production in several countries  
130 for growth promotion, therapeutical and prophylactical purposes to control of  
131 *Enterobacteriaceae* infections, particularly for those caused by *E.coli* [5-6]. In 2016, Chinese  
132 scholars first reported that plasmid-mediated colistin resistance was encoded by the *mcr-1*  
133 gene [1]. With this discovery, the higher prevalence of samples harboring *mcr-1* gene in  
134 animal isolates compared to other origins raised alarm bell about the impact of colistin use on  
135 colistin resistance spread in animal production, livestock and poultry have been recognized as  
136 the major reservoir for colistin resistance transmission and amplification [9].

137 During 2015-2016, we collected 2199 faecal swabs from pigs, chicken and cattle to make  
138 clear prevalence of colisitn resistance in intensive breeding farms of Jiangsu Province. Our

139 study using selected chromogenic agar with colistin showed that *E.coli* resistance to colistin  
140 occurred widely in pigs (54.25 %), poultry (35.96 %) and cattle (26.92 %), suggesting that  
141 colistin resistance was considerably serious, especially in pigs. From 2013 to 2014, it was  
142 reported that a high frequency of colistin resistance in *E. coli* from pigs (26.5%), from  
143 chickens (14.0%), and from cattle (0.9%) on farms in different geographic areas of China,  
144 including Jiangsu Province [10]. Increasing use of colistin in fodder in recent years may be  
145 the reason of the high prevalence of colistin resistance in these food animals. Here, in 811 pig  
146 samples, colistin resistant colonies were identified from 85.08 % (154/181) of sows and  
147 73.64 % (162/220) of fattening pigs, significantly higher than 19.10 % (38/199) of sucking  
148 piglet, 40.76 % (86/211) of weaned piglets. The same patterns also were found in chicken  
149 1232 samples and 156 cattle samples. The highest proportions of resistant *E.coli* colonies  
150 were identified from the adult animals, implying that the long-term selective pressure resulted  
151 in not only the highest prevalence of colistin resistance among *E. coli* isolates from adult  
152 animals found in this study, but also bacterial evolution and adaption from the piglet groups  
153 to adult groups [11]. Compared with the isolates from pigs and chickens recovered during  
154 2013-2014, *E. coli* isolates collected during 2007-2008 (5.5%) and 2010-2011 (12.4%)  
155 showed significantly lower frequency of colistin resistance [12]. A high frequency of colistin  
156 resistance in *E. coli* from pigs on farm (24.1%) and from chickens on farm (14.0%) led to a  
157 high prevalence of colistin at pig slaughter (24.3%) and chicken slaughter (9.5%) in  
158 2013-2014 [12]. The adult animals generally entered the slaughter house and the food chains,  
159 drug-resistant strains inevitably invaded our dining table for consumers to cause public health  
160 events. Sows are the reservoir of resistant strains, they give not only life to piglets, but also  
161 resistant strains to them, which promote drug resistance circulation among Chinese farms [13].  
162 The link between animals and humans in terms of colistin resistant *E. coli* strain transfer  
163 following direct contact has recently been confirmed [14]. The overuse of antibiotics will  
164 promote the unrestricted expansion and circulation of drug-resistant strains among  
165 human-animals-environment.

166 While colistin is a last-line antibiotic used to treat multidrug resistant Gram-negative

167 bacteria (GNB) isolated from food animals, raw meat, and humans in several countries [15],  
168 its efficacy is being compromised by the detected mobile colistin resistance genes, *mcr-1* at  
169 the end of 2015 [2], and subsequently *mcr-2*, *mcr-3*, *mcr-4*, *mcr-5*[8, 16]. Of all the colistin  
170 resistant *E.coli* colonies in our study, the *mcr-1* was the predominant gene for the colistin  
171 resistance of *E.coli*, higher than *mcr-2*. The *mcr-1* prevalence was 68.86 % (303/440) in pigs,  
172 87.58 % (388/443) in chicken, and 71.43 % (30/42) in cattle, compared with *mcr-2*  
173 prevalence of 46.82 % (206/440) in pigs, 14.90 % (66/443) in chicken, and 19.05 % (8/42) in  
174 cattle. The *mcr* variant gene prevalence reported by [17] was considerably higher than ours  
175 and those previously reported in China which was based on the presence of the *mcr* in  
176 bacterial isolates. They directly detected the clinical samples instead of isolated *E.coli* strains  
177 and sequenced three variants of *mcr-1*, *mcr-2*, and *mcr-3* [17]. The *mcr-1* and *mcr-2* occurred  
178 widely in pigs and poultry of Chinese farms [17-18]. Except harbouring the *mcr* genes, a  
179 *mcr*-independent mechanism behind the remaining colistin resistant *E.coli* colonies, for  
180 example, lipopolysaccharide modification [19], other (transferable) colistin-resistant  
181 mechanisms, and undefined mechanisms exist. The implication of the *mcr* gene wide spread  
182 will be enormous if plasmid-mediated colistin resistance was readily passed between *E. coli*  
183 strains, and also be passed to *Klebsiella pneumoniae* and *Pseudomonas aeruginosa* strains  
184 like descriptions in *the Lancet Infectious Disease* published by Liu Yi-Yun and colleagues [2].  
185 Since 1 April 2017, the Chinese government has implemented the withdrawal of colistin as a  
186 food additive for growth promotion in food animal [20], this policy is in line with  
187 international policy of One Health.

## 188 5. CONCLUSION

189 The management of colistin resistance at the human-animal-environment interface requires  
190 the urgent use of the One Health approach for effective control and prevention. Our study will  
191 provide new data about colistin resistance prevalence worldwide. The colistin resistance  
192 widely occurred at all ages of domestic animals and the *mcr*-dependent mechanism dominated

193 in *E.coli*. We also found that the older and adult animals were a reservoir of resistant strains,  
194 suggesting a potential food safety issue and greater public health problems.

#### 195 **AUTHOR CONTRIBUTIONS**

196 Zhang XH and He KW conceived and designed the experiments. Zhang BC analyzed the data.  
197 Yu ZY, GuoYY, WangJ, Zhao PD, and Liu JJ performed the experiments; Zhang XH and  
198 Zhang BC wrote the paper.

199

#### 200 **ACKNOWLEDGEMENTS**

201 *Funding:* This work was supported by the National Natural Science Foundation of China  
202 (31572503) and Jiangsu R&D plan (BE2017341-1).

203 *Competing interests:* The funders had no role in study design, data collection and analysis,  
204 decision to publish, or preparation of the manuscript.

205 *Ethical approval:* Ethical approval was granted by the Ethics Committee of the Institute of  
206 Veterinary Medicine, Jiangsu Academy of Agricultural Sciences (Nanjing, Jiangsu, China)  
207 [20150212].

208

#### 209 **REFERENCES**

- 210 [1] Investigation of *E. coli* Harboring the *mcr-1*Resistance Gene — Connecticut, 2016.  
211 Morbidity and Mortality Weekly Report (MMWR) 2016; 65(36), 979-80.
- 212 [2] Liu YY, Wang Y, Walsh TR, Yi LX, Zhang R, Spencer J, Doi Y, Tian G, Dong B, Huang X,  
213 Yu LF, Gu D, Ren H, Chen X, Lv L, He D, Zhou H, Liang Z, Liu JH, Shen J. 2016.  
214 Emergence of plasmid-mediated colistin resistance mechanism MCR-1 in animals and  
215 human beings in China: a microbiological and molecular biological study. The Lancet  
216 Infect Dis 16(2): 161-8.



- 217 [3] Nicolet S, Goldenberger D, Schwede T, Page M, Creus M. 2016. Plasmid-mediated  
218 colistin resistance in a patient infected with *Klebsiella pneumoniae*. *The Lancet Infect Dis*  
219 16(9): 998-9.
- 220 [4] Van Boeckel TP, Brower C, Gilbert M, Grenfell BT, Levin SA, Robinson TP, Teillant A,  
221 Laxminarayan R. 2015. Global trends in antimicrobial use in food animals. *Proc Natl*  
222 *Acad Sci U S A* 112(18): 5649-54.
- 223 [5] Guyonnet J, Manco B, Baduel L, Kaltsatos V, Aliabadi MH, and Lees P. 2010.  
224 Determination of adosage regimen of colistin by pharmacokinetic/pharmacodynamics  
225 integration and modeling for treatment of G.I.T. disease in pigs. *Res Vet Sci* 88, 307-14.
- 226 [6] Rhouma M, Beaudry F, and Letellier A. 2016. Resistance to colistin: what is the fate for  
227 this antibiotic in pig production? *Int J Antimicrob Agents* 48, 119-26.
- 228 [7] Miyagu chi H, Narita H, Sakamoto K. 1996. An antibiotic-binding motif of an RNA  
229 fragment derived from the A site related region of *E. coli* 16S rRNA. *Nucleic Acids Res*  
230 24: 3700-6.
- 231 [8] Xavier BB, Lammens C, Ruhai R, Kumar-Singh S, Butaye P, Goossens H,  
232 Malhotra-Kumar S. 2016. Identification of a novel plasmid-mediated colistin-resistance  
233 gene, *mcr-2*, in *Escherichia coli*, Belgium, June 2016. *Euro Surveill* 21 (27).
- 234 [9] Hoelzer K, Wong N, Thomas J, Talkington K, Jungman E, Coukell A. 2017. Antimicrobial  
235 drug use in food-producing animals and associated human health risks: what, and how  
236 strong, is the evidence? *BMC Vet Res* 13(1):211.
- 237 [10] China Veterinary Drug Association. Annual Report on Development of Veterinary  
238 Medicine Industry in China (2012). Beijing: China Agriculture Press 2014.
- 239 [11] Jans C, Sarno E, Collineau L, Meile L, Stärk KDC, Stephan R. 2018. Consumer exposure  
240 to antimicrobial resistant bacteria from food at Swiss retail level. *Front Microbiol* 9:362.
- 241 [12] Liebana E, Carattoli A, Coque TM, Hasman H, Magiorakos AP, Mevius D, Peixe L,  
242 Poirel L, Schuepbach-Regula G, Torneke K, Torren-Edo J, Torres C, Threlfall J. 2013.  
243 Public health risks of enterobacterial isolates producing extended spectrum  
244 beta-lactamases or AmpC beta-lactamases in food and food producing animals: an EU

- 245 perspective of epidemiology, analytical methods, risk factors, and control options. Clin  
246 Infect Dis 56, 1030-7.
- 247 [13] Huang X, Yu L, Chen X, Zhi C, Yao X, Liu Y, Wu S, Guo Z, Yi L, Zeng Z, Liu J. 2017.  
248 High prevalence of colistin resistance and *mcr-1* gene in *Escherichia coli* isolated from  
249 food animals in china. Front Microbiol 8:562.
- 250 [14] Rhouma M, Beaudry F, Thériault W, Letellier A. 2016. Colistin in Pig Production:  
251 Chemistry, Mechanism of Antibacterial Action, Microbial Resistance Emergence, and  
252 One Health Perspectives. Front Microbiol 11:7.
- 253 [15] Rhouma M, Beaudry F, Thériault W, Bergeron N, Laurent-Lewandowski S, Fairbrother  
254 JM, Letellier A. 2015. Gastric stability and oral bioavailability of colistin sulfate in pigs  
255 challenged or not with *Escherichia coli* O149: F4(K88). Res Vet Sci 102, 173-81.
- 256 [16] Fukuda A, Sato T, Shinagawa M, Takahashi S, Asai T, Yokota S-i, Usui M, Tamura Y.  
257 2018. High prevalence of *mcr-1*, *mcr-3*, and *mcr-5* in *Escherichia coli* derived from  
258 diseased pigs in Japan. Int J Antimicrob Agents 51(1):163-4.
- 259 [17] Zhang J, Chen L, Wang J, Yassin AK, Butaye P, Kelly P, Gong J, Guo W, Li J, Li M ,  
260 Yang F, Feng Z, Jiang P, Song C, Wang Y, You J, Yang Y, Price S, Qi K, Kang Y, Wang C.  
261 2018. Molecular detection of colistin resistance genes (*mcr-1*, *mcr-2* and *mcr-3*) in  
262 nasal/oropharyngeal and anal/cloacal swabs from pigs and poultry. Sci Rep 27, 8(1):3705.
- 263 [18] Yassin AK, Zhang J, Wang J, Chen L, Kelly P, Butaye P, Lu G, Gong J , Li M, Wei L,  
264 Wang Y, Qi K, Han X, Price S, Hathcock T, Wang C. 2017. Identification and  
265 characterization of *mcr* mediated colistin resistance in extraintestinal *Escherichia coli*  
266 from poultry and livestock in China. FEMS Microbiol Lett 29,364(24).
- 267 [19] Guerin F, Isnard C, Sinel C, Morand P, Dhalluin A, Cattoir V, Giard JC. 2016.  
268 Cluster-dependent colistin hetero-resistance in *Enterobacter cloacae* complex. J  
269 Antimicrob Chemother 71(11): 3058-61.
- 270 [20] Wang X, Liu Y, Qi X, Wang R, Jin L, Zhao M, Zhang Y, Wang Q, Chen H, Wang H. 2017.  
271 Molecular epidemiology of colistin-resistant Enterobacteriaceae in inpatients and avian  
272 from China: high prevalence of *mcr*-negative *Klebsiella pneumoniae*. Int J Antimicrob

273 Ag 50(4):536-41.

274

275

276

277 **Table 1:** Categories of samples and numbers of colistin resistance-positive *E. coli*. and  
278 *mcr*-positive *E. coli*. in this study.

279 **Table 2:** Primers used in this study

280 **Fig. 1** Prevalence of colistin resistance and *mcr* genes in all ages of animals

281

282

283

284

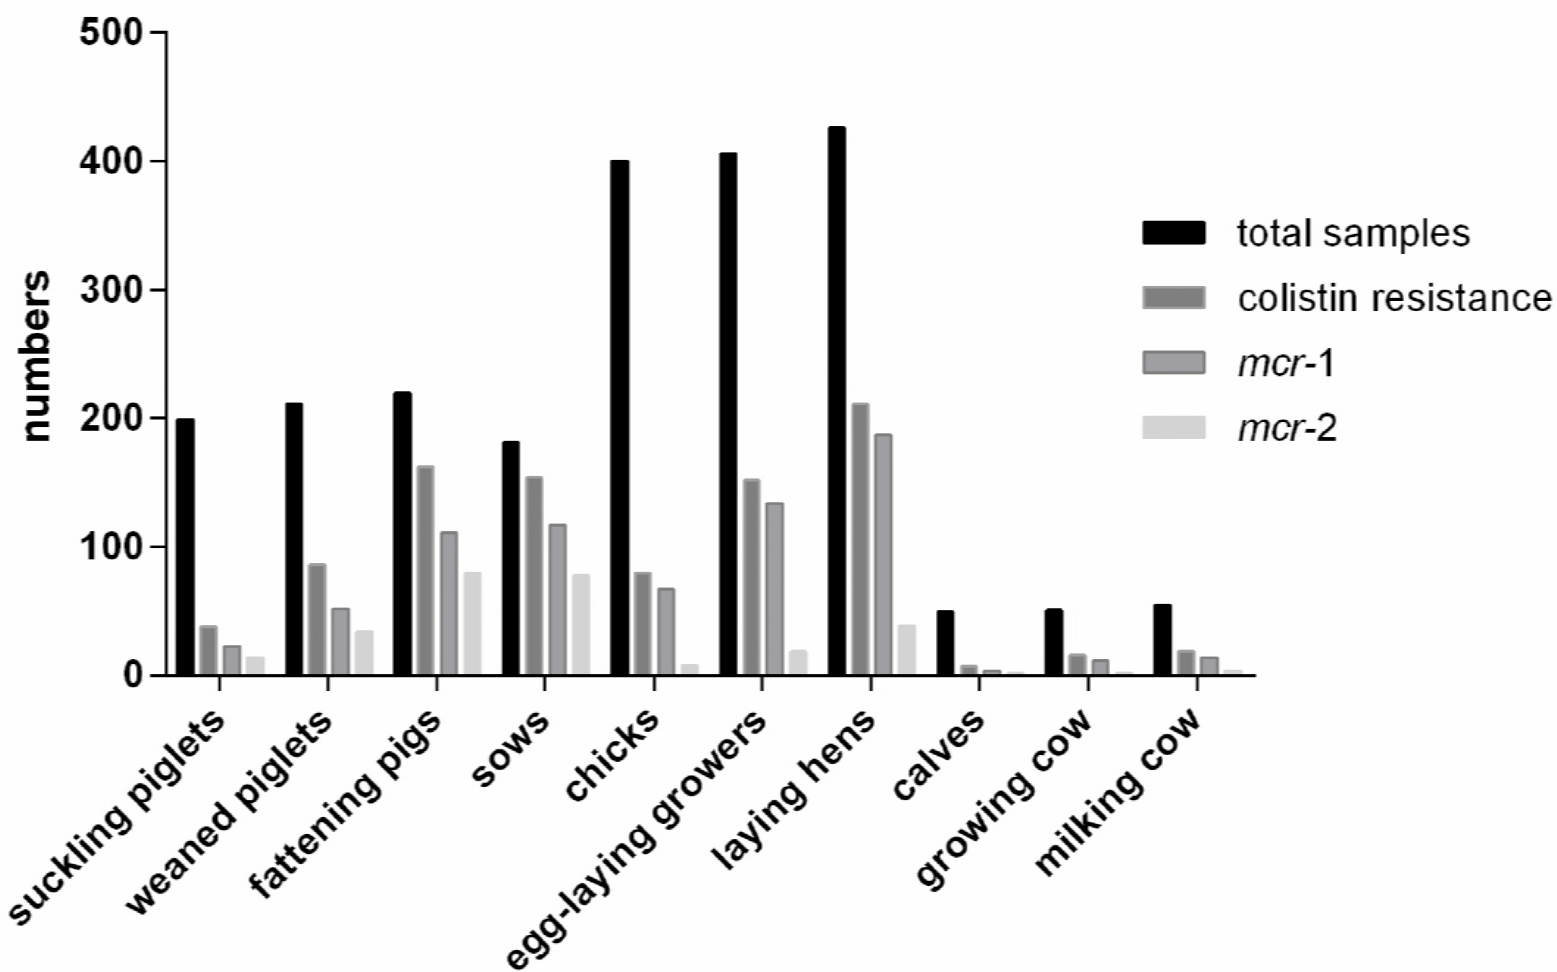

**Table 1:** Categories of samples and numbers of colistin resistance-positive *E. coli*. and *mcr*-positive *E. coli*. in this study.

| <b>total</b>                |             | Colistin<br>resistance | <i>mcr</i> -1+ | <i>mcr</i> -2+ | <i>mcr</i> -1+<br><i>mcr</i> -2+ | <sup>a</sup> others |
|-----------------------------|-------------|------------------------|----------------|----------------|----------------------------------|---------------------|
| <b>Swine faecal swabs</b>   | <b>811</b>  | <b>440</b>             | <b>303</b>     | <b>206</b>     | <b>88</b>                        | <b>19</b>           |
| suckling piglets            | 199         | 38                     | 23             | 14             | 3                                | 4                   |
| weaned piglets              | 211         | 86                     | 52             | 34             | 8                                | 8                   |
| fattening pigs              | 220         | 162                    | 111            | 80             | 33                               | 4                   |
| sows                        | 181         | 154                    | 117            | 78             | 44                               | 3                   |
| <b>Chicken faecal swabs</b> | <b>1232</b> | <b>443</b>             | <b>388</b>     | <b>66</b>      | <b>32</b>                        | <b>21</b>           |
| chicks                      | 400         | 80                     | 67             | 8              | 4                                | 9                   |
| egg-laying growers          | 406         | 152                    | 134            | 19             | 7                                | 6                   |
| laying hens                 | 426         | 211                    | 187            | 39             | 21                               | 6                   |
| <b>Cattle faecal swabs</b>  | <b>156</b>  | <b>42</b>              | <b>30</b>      | <b>8</b>       | <b>4</b>                         | <b>8</b>            |
| calves                      | 50          | 7                      | 4              | 2              | 0                                | 1                   |
| growing cows                | 51          | 16                     | 12             | 2              | 1                                | 3                   |
| milking cows                | 55          | 19                     | 14             | 4              | 3                                | 4                   |

**a:** colistin-resistant *E.coli* colonies were not positive amplification for *mcr*-1 and *mcr*-2 gene.

**Table 2: Primers used in this study**

| Primer | Nucleotide sequences (5'-3')                         | Gene name     | Length (bp) |
|--------|------------------------------------------------------|---------------|-------------|
| P1-F/R | agagtttgatcatggctcag<br>aaggagtgatccaaccgca          | 16srRNA       | 1543        |
| P2-F/R | atgatgcagcatacttctgtgtgt<br>tcagcggatgaatgcggtgcggtc | <i>mcr</i> -1 | 1626        |
| P3-F/R | tggtacagcccctttatt<br>gcttgagattgggttatga            | <i>mcr</i> -2 | 1747        |
